# Supplementary material for: Separate signaling events control TCR downregulation and T cell activation in primary human T cells
Source: PubMed Central journal article supplement (PMC7860602; doi:10.1002/iid3.383), 2020-12-22
Supplement: IID3-9-223-s001.pdf [file IID3-9-223-s001.pdf]

# 1 Supplemental information

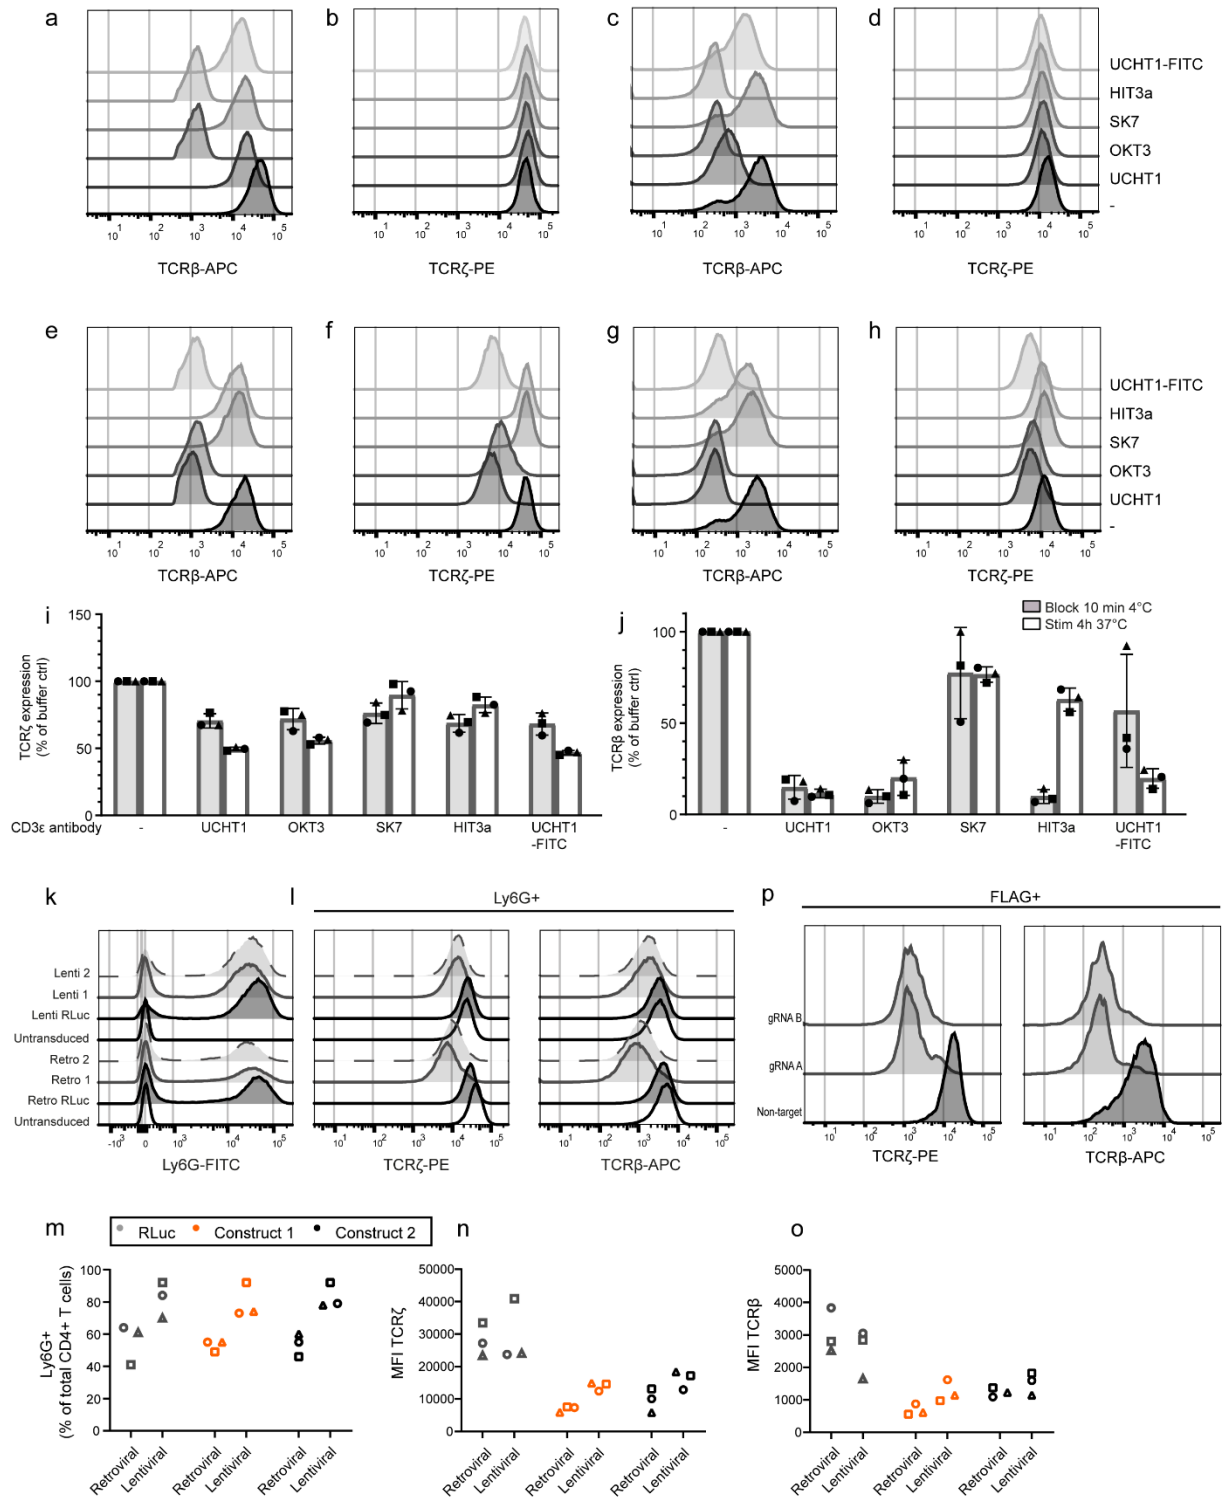

2  
3 **Supplemental Figure 1. Investigation of steric hindrance and stimulation, and genetic modification**  
4 **of human CD4<sup>+</sup> PBLs and Jurkat cells**

5 (A-D) Representative histograms showing steric hindrance for human PBLs (A, B) and Jurkat cells (C,  
6 D). Surface TCRβ (A) and total TCRζ (B) expression in human PBLs, and surface TCRβ (C) and total TCRζ

7 (D) expression in Jurkat cells were measured after incubation with the indicated anti-CD3 antibodies  
8 at 4°C. (E-H) Representative histograms showing the effect of anti-CD3/CD28 stimulation on human  
9 PBLs (E, F) and Jurkat cells (G, H). Surface TCR $\beta$  (E) and total TCR $\zeta$  (F) expression in human PBLs, and  
10 surface TCR $\beta$  (G) and total TCR $\zeta$  (H) expression in Jurkat cells after stimulation at 37°C.  
11 (I-J) Aggregate data of total TCR $\zeta$  (I) and surface TCR $\beta$  (J) expression of Jurkat cells. For Jurkat cells, each  
12 symbol represents an independent experiment (n=3), and the median and 95% CI are shown.  
13 Expression in non-triggered T cells is set at 100%, based on the MFI.  
14 (K-P) Optimization of genetic modification of hPBL and Jurkat cells. (K-L) Representative histograms  
15 showing the surface Ly6G (K), total TCR $\zeta$ , and surface TCR $\beta$  (L) expression of human CD4<sup>+</sup> PBLs after  
16 transduction with retroviral/lentiviral microRNA vectors targeting TCR $\zeta$  in n=3 independent  
17 experiments with a different donor.  
18 (M-O) Comparison between lentiviral and retroviral microRNA knockdown efficiency of TCR $\zeta$  in human  
19 CD4<sup>+</sup> PBLs. Percentage of transduced cells (Ly6G<sup>+</sup>; M), total TCR $\zeta$  (N) and surface TCR $\beta$  (O) levels were  
20 measured. (P) For the transduction of Jurkat cells with lentiviral CRISPR/Cas9 vectors targeting TCR $\zeta$ ,  
21 total TCR $\zeta$  and surface TCR $\beta$  expression in FLAG-positive Jurkat cells was measured. (M-O) Each symbol  
22 represents an individual donor, examined in a separate experiment. (P) Representative plots of n=2  
23 independent experiments.

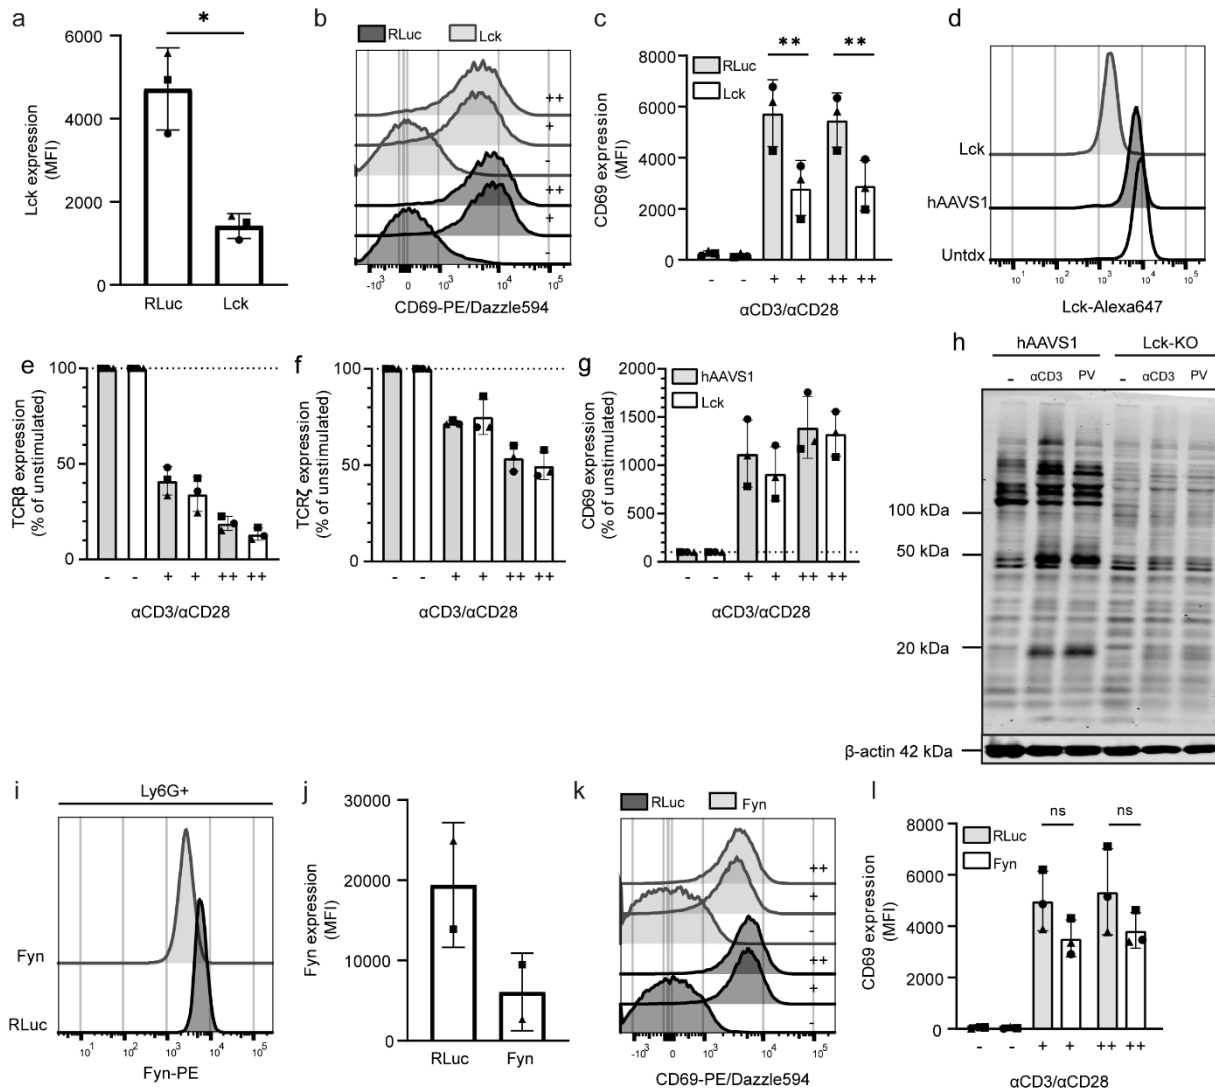

24

25 **Supplemental Figure 2. Lck and Fyn are individually redundant for TCR downregulation in human**  
 26 **PBLs and Jurkat cells**

27 (A) Aggregate data of total Lck expression of human PBLs after transduction with microRNA vectors  
 28 targeting Lck, for n=3 healthy donors examined in a separate experiment. (B, C) (B) Representative  
 29 histogram and (C) aggregate data showing the effect of Lck knockdown on CD69 expression in different  
 30 donors (n=3) and different experiments that were left unstimulated (-), or stimulated with low (+) or  
 31 high (++) dose anti-CD3/CD28. Significance is calculated with the paired student's *t*-test, \**p*<0.05;  
 32 \*\**p*<0.01.

33 (D) Total Lck expression of Jurkat cells after transduction with CRISPR/Cas9 vectors targeting Lck.

34 (E-G) Surface TCR $\beta$  (E), total TCR $\zeta$  (F) and surface CD69 (G) expression of Jurkat cells with Lck  
35 knockdown left unstimulated (-), or upon TCR triggering by low (+) or high (++) dose anti-CD3/CD28 for  
36 n=3 separate experiments.

37 (H) Immunoblot showing the total tyrosine phosphorylation of cells that were transduced with non-  
38 target or Lck CRISPR/Cas9 vectors, and that were unstimulated (-), anti-CD3 stimulated, or anti-CD3  
39 and pervanadate (PV) stimulated.  $\beta$ -actin was used as loading control. Immunoblot is representative  
40 of a single biological replicate.

41 (I) Representative histogram showing the total Fyn expression of human PBLs after transduction with  
42 non-target microRNAs or microRNA vectors targeting Fyn. (J) Aggregate data of total Fyn expression of  
43 human PBLs after transduction with microRNA vectors targeting Fyn, for n=2 healthy donors examined  
44 in a separate experiment.

45 (K, L) Representative histogram (K) and aggregate data (L) showing the effect of Fyn knockdown on  
46 CD69 expression in different donors (n=3) that were left unstimulated (-), or stimulated with low (+) or  
47 high (++) dose anti-CD3/CD28. Significance is calculated with the paired student's *t*-test, \* $p < 0.05$ ;  
48 \*\* $p < 0.01$ .

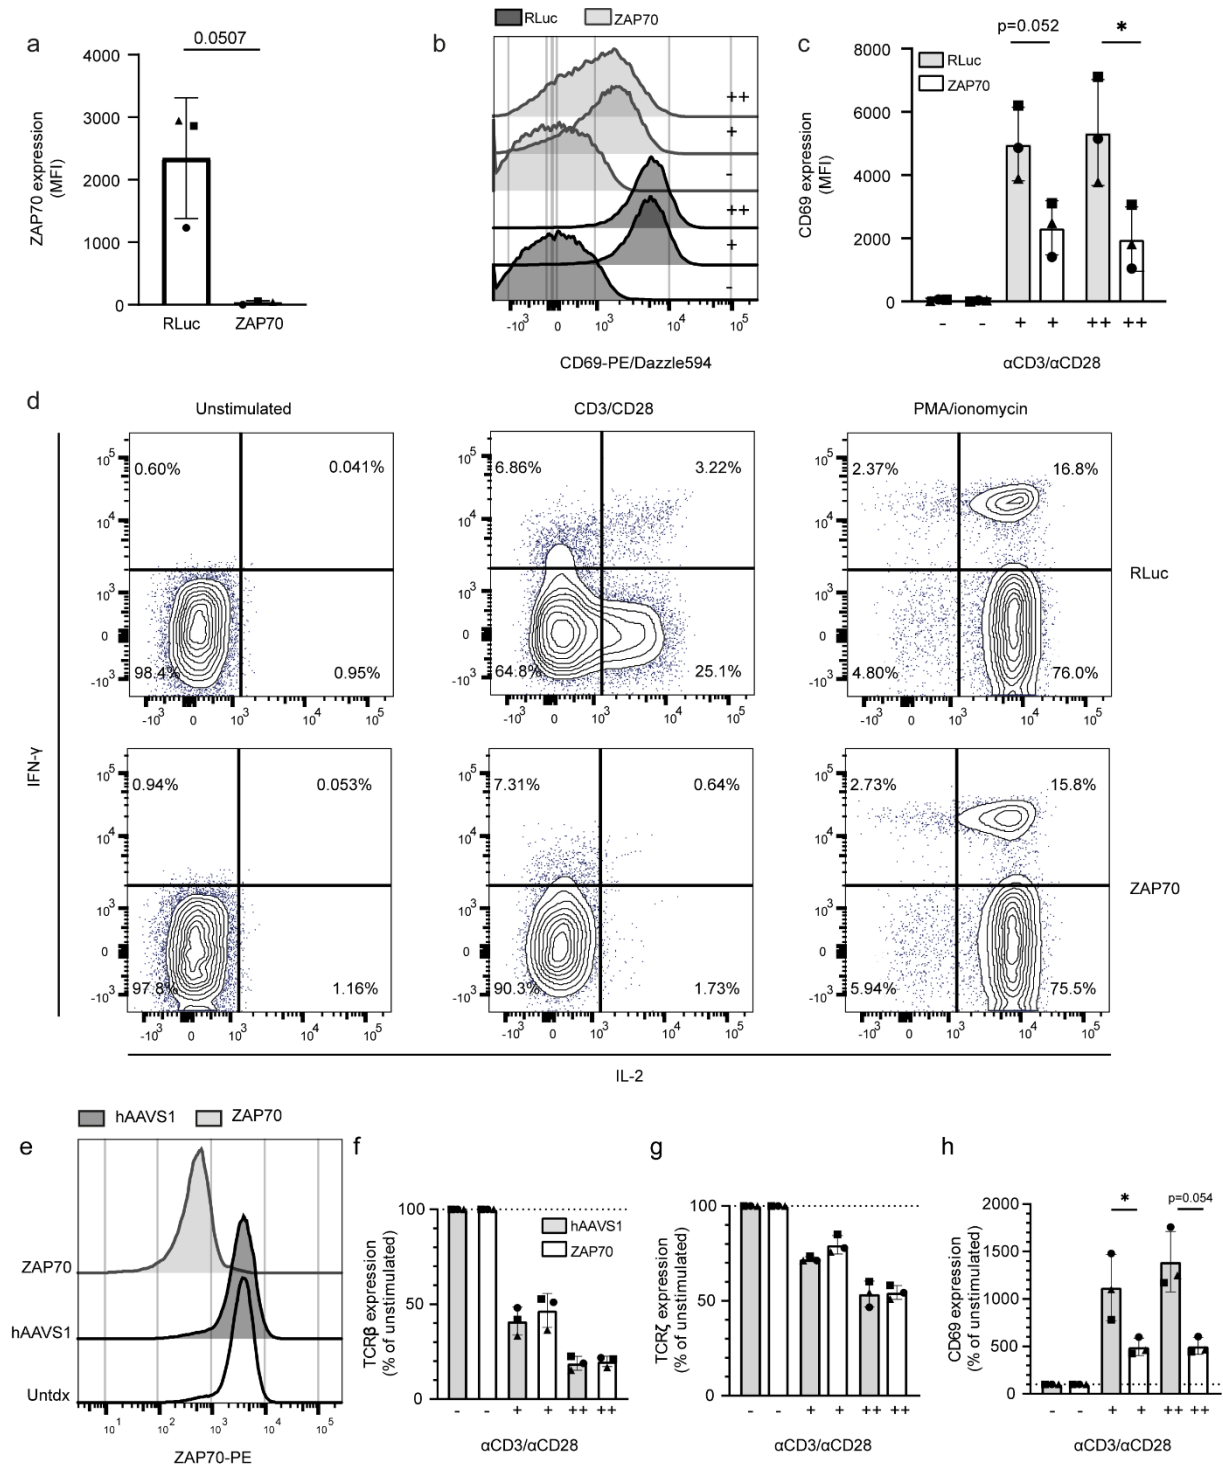

49

50 **Supplemental Figure 3. ZAP70 is required for T cell activation and effector functions in human CD4<sup>+</sup>**

51 **PBLs**

52 (A) Aggregate data of total ZAP70 expression of human PBLs after transduction with microRNA vectors

53 targeting ZAP70. (B, C) Representative histogram (B) and aggregate data (C) of surface CD69

54 expression in human PBLs with ZAP70 knockdown (dark grey) or non-target microRNA (light grey)

55 without stimulation (-), or upon TCR triggering by low (+) or high (++) dose anti-CD3/CD28. (A, C) Each  
56 symbol represents an individual donor (n=3) examined in a separate experiment, with bars depicting  
57 the mean and standard deviation. Significance was calculated with paired student's *t*-test. \* $p < 0.05$ .  
58 (D) Effect of ZAP70 knockdown on cytokine production by PBLs. Representative plots of 1 donor.  
59 (E) Total ZAP70 expression of Jurkat cells after transduction with CRISPR/Cas9 vectors targeting ZAP70  
60 (light grey) or a non-target guide-RNA (dark grey). (F-H) Surface TCR $\beta$  (F), total TCR $\zeta$  (G) and surface  
61 CD69 (H) expression of PBLs with ZAP70 knockout left unstimulated (-), or upon TCR triggering by low  
62 (+) or high (++) dose anti-CD3/CD28 for n=3 separate experiments.

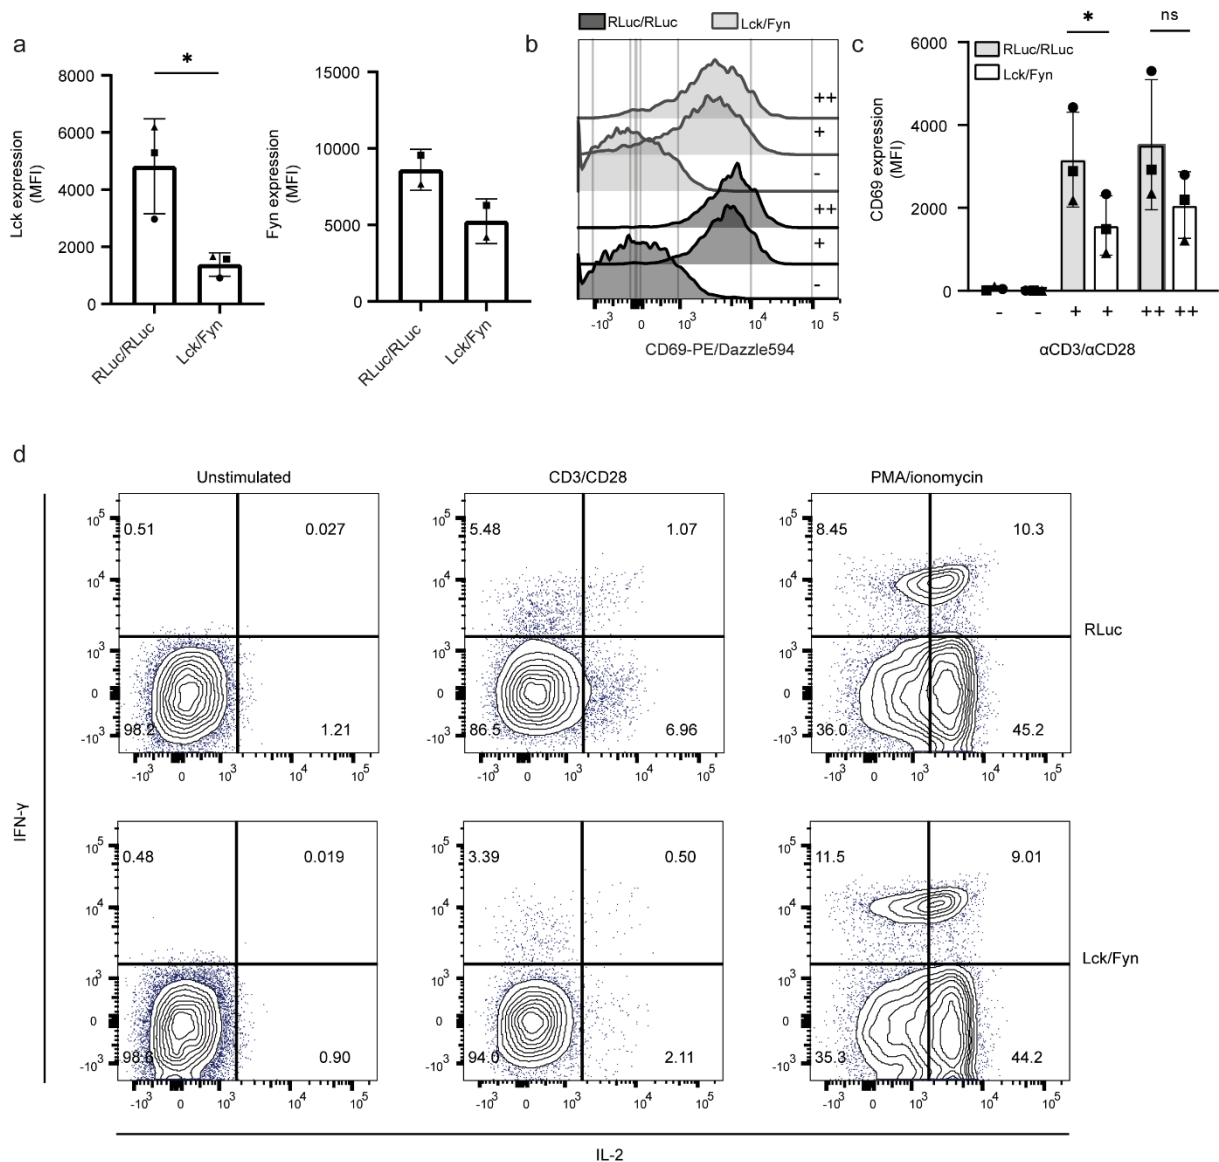

63

64 **Supplemental Figure 4. Lck and Fyn double knockdown slightly impairs activation of human PBLs**

65 (A) Aggregate data of total Lck and Fyn expression in human PBLs after transduction with microRNA  
 66 vectors targeting Lck and Fyn. (B, C) Surface CD69 expression of human PBLs transduced with non-  
 67 target microRNA vectors (dark grey) or double Lck and Fyn knockdown (light grey) left unstimulated (-  
 68 ), or upon TCR triggering by low (+) or high (++) dose anti-CD3/CD28. (A, C) Each symbol represents an  
 69 individual donor (n=3) examined in a separate experiment, with bars depicting the mean and standard  
 70 deviations. (D) Representative plots (n=3) of the effect of Lck and Fyn double knockdown on cytokine  
 71 production by human PBLs. Significance was calculated with the paired student's *t*-test. \*p<0.05.

72 **Supplementary Table 1. Overview of the antibodies used in this study**

| <b>Antibody</b>              | <b>Clone</b> | <b>Manufacturer</b> |
|------------------------------|--------------|---------------------|
| Anti-mouse Ly6G/Ly6C         | RB6-8C5      | eBioscience         |
| Anti-mouse CD90.2            | 30-H12       | Biolegend           |
| Anti-mouse IgG1              | RMG1-1       | Biolegend           |
| Mouse IgG1, isotype ctrl     | MOPC-21      | Biolegend           |
| Anti-mouse/human TCR $\zeta$ | 6B10.2       | Biolegend           |
| Anti-human CD4               | RPA-T4       | Biolegend           |
| Anti-human CD8 $\alpha$      | RPA-T8       | Biolegend           |
| Anti-human CD45              | HI100        | Biolegend           |
| Anti-human CD45RA            | HI100        | Biolegend           |
| Anti-human CD27              | O323         | Biolegend           |
| Anti-human CD69              | FN50         | Biolegend           |
| DYK/FLAG tag                 | L5           | Biolegend           |
| Anti-human CD3 $\epsilon$    | UCHT1        | Biolegend           |
| Anti-human CD3 $\epsilon$    | OKT3         | Biolegend           |
| Anti-human CD3 $\epsilon$    | SK7          | Biolegend           |
| Anti-human CD3 $\epsilon$    | HIT3a        | Biolegend           |
| Anti-human CD28              | CD28.2       | Biolegend           |
| Anti-human TCR $\beta$       | IP26         | Biolegend           |
| Anti-human Lck               | LCK-01       | Biolegend           |
| Anti-human ZAP70             | 1E7.2        | Biolegend           |
| Anti-human IL-2              | MQ1-17H12    | Biolegend           |
| Anti-human IFN- $\gamma$     | B27          | Biolegend           |
| Anti-human Actin (beta)      | W16197A      | Biolegend           |
| Anti-human phospho-tyrosine  | PY20         | Biolegend           |
| Anti-human Fyn               | FYN-59       | Biolegend           |

73
